# Supplementary material
Source: PubMed Central journal article supplement (PMC7855049)
Supplement: NIHMS1637883-supplement-cncr33292-sup-0001-Supinfo.pdf [file NIHMS1637883-supplement-cncr33292-sup-0001-Supinfo.pdf]

## Data and Methods Supplement

### Supplemental Methods for Covariates in Exercise Intolerance Analysis

As noted in Table 1, the analysis examining the association of NT-proBNP with exercise intolerance adjusted for demographic factors, smoking (pack-years), diet quality, physical activity and performance measures known to impact exercise capacity.

Moderate or vigorous physical activity was reported as minutes per week on the National Health and Nutrition Survey Physical Activity Questionnaire<sup>1</sup> and diet quality as the score on the Healthy Eating Index, out of 100, with the average score of the US population being 59.<sup>2,3</sup>

Performance measures included the following: chronotropic incompetence<sup>4</sup> or blunted blood pressure (BP) response<sup>5</sup> defined as survivors who achieved < 80% of age- and sex-predicted heart rate reserve ( $\leq 62\%$  if taking  $\beta$  blockers or calcium channel blockers)<sup>6</sup> or had < 20 mmHg systolic BP rise during CPET, forced expiratory volume in 1 second (FEV<sub>1</sub>) measured using prebronchodilator spirometry and impairment was defined as FEV<sub>1</sub> < 80% predicted for race and sex,<sup>7</sup> seated, relative isokinetic quadriceps strength (Newton-meters per kilogram) converted to age- and sex-specific z scores based on values from community controls (Biodex System 4; Biodex Medical Systems, Shirley, NY)<sup>8,9</sup>, and the modified total neuropathy scale (MTNS) to evaluate peripheral sensorimotor function with scores  $\geq 5$  (of 24) used to define impairment.<sup>10</sup> Resting heart rate, respirations, and BP were measured after 5 minutes of quiet sitting before exercise testing. Heart rate and BP were also measured during the test, at peak exercise, and 2 and 5 minutes into recovery.

**Table S1.** Abnormal NT-proBNP cut-points defined by 97.5<sup>th</sup> percentile limit of normal by age and sex (from the Framingham Heart Study)

| Age Group (Years) | NT-proBNP (pg/ml) 97.5 <sup>th</sup> Quantile reference limit |       |
|-------------------|---------------------------------------------------------------|-------|
|                   | Men                                                           | Women |
| 20-24             | 42.5                                                          | 111.0 |
| 25-29             | 48.5                                                          | 122.1 |
| 30-34             | 55.3                                                          | 134.3 |
| 35-39             | 63.0                                                          | 147.6 |
| 40-44             | 71.8                                                          | 162.4 |
| 45-49             | 81.9                                                          | 178.5 |
| 50-54             | 93.3                                                          | 196.3 |
| 55-59             | 106.4                                                         | 215.9 |

Reprinted from *The American Journal of Cardiology*. Vol. 108/Edition 9. Fradley MG, Larson MG, Cheng S, et al. Reference limits for N-terminal-pro-B-type natriuretic peptide in healthy individuals (from the Framingham Heart Study). Pages No.1341-1345. (2011), with permission from Elsevier.

**Table S2.** Grading of cardiovascular risk factors and other chronic health conditions by modified common terminology criteria for adverse events (CTCAE) v4.03

| Condition                                                                 | Grading Source                                                                                                                             | Grading Rubric                                                                                                                                                                                                                                                                                                                                                                                                                                                                                                                                                                                                                                                                                                                                                           |                                                                                              |
|---------------------------------------------------------------------------|--------------------------------------------------------------------------------------------------------------------------------------------|--------------------------------------------------------------------------------------------------------------------------------------------------------------------------------------------------------------------------------------------------------------------------------------------------------------------------------------------------------------------------------------------------------------------------------------------------------------------------------------------------------------------------------------------------------------------------------------------------------------------------------------------------------------------------------------------------------------------------------------------------------------------------|----------------------------------------------------------------------------------------------|
| <b>Left ventricular systolic dysfunction</b><br>(Includes cardiomyopathy) | <b>Modified</b> CTCAE v4.03<br>Investigations: Ejection fraction decreased (grades 2&3)<br>Left ventricular systolic dysfunction (grade 4) | 1: Not applicable<br>2: Resting EF < 50-40%; 10 - 19% absolute drop from baseline<br>3: Resting EF 39-20%; >20% absolute drop from baseline; medication indicated or initiated<br>4: Resting EF<20%; refractory or poorly controlled heart failure due to drop in ejection fraction; on medical management; intervention such as ventricular assist device, intravenous vasopressor support, or heart transplant indicated<br>5: Death                                                                                                                                                                                                                                                                                                                                   |                                                                                              |
| <b>Dyslipidemia</b>                                                       |                                                                                                                                            |                                                                                                                                                                                                                                                                                                                                                                                                                                                                                                                                                                                                                                                                                                                                                                          |                                                                                              |
| High total cholesterol                                                    | <b>Modified</b> CTCAE v4.03<br>Investigations: Cholesterol high                                                                            | 1: >200 mg/dL - 300 mg/dL<br>2: >300 - 400 mg/dL; treatment with one lipid lowering agent<br>3: >400 - 500 mg/dL; treatment with >=2 lipid lowering agent<br>4: >500 mg/dL<br>5: Not applicable                                                                                                                                                                                                                                                                                                                                                                                                                                                                                                                                                                          |                                                                                              |
| Hypertriglyceridemia                                                      | <b>Modified</b> CTCAE v4.03<br>Metabolism and Nutrition Disorders: Hypertriglyceridemia                                                    | 1: 150 mg/dL - 300 mg/dL<br>2: >300 mg/dL - 500 mg/dL; treatment with one lipid lowering agent<br>3: >500 mg/dL - 1000 mg/dL; treatment with >=2 lipid lowering agents<br>4: >1000 mg/dL; life-threatening consequences<br>5: Death                                                                                                                                                                                                                                                                                                                                                                                                                                                                                                                                      |                                                                                              |
| <b>Hypertension</b>                                                       | <b>Modified</b> CTCAE v4.03<br>Vascular Disorders: Hypertension                                                                            | 1: Prehypertension (systolic BP 120 - 139 mm Hg or diastolic BP 80 - 89 mm Hg)<br>2: Stage 1 hypertension (systolic BP 140 - 159 mm Hg or diastolic BP 90 - 99 mm Hg); medical intervention indicated or initiated; recurrent or persistent (>=24 hrs); symptomatic increase by >20 mm Hg (diastolic) or to >140/90 mm Hg if previously WNL; monotherapy indicated or initiated<br>3: Stage 2 hypertension (systolic BP >=160 mm Hg or diastolic BP >=100 mm Hg); medical intervention indicated; more than one drug or more intensive therapy than previously used indicated or initiated<br>4: Life-threatening consequences (e.g., malignant hypertension, transient or permanent neurologic deficit, hypertensive crisis); urgent intervention indicated<br>5: Death |                                                                                              |
| <b>Diabetes mellitus</b>                                                  | <b>Modified</b> CTCAE v4.03 Metabolism and nutrition disorders: Glucose intolerance                                                        | 1: Asymptomatic; clinical or diagnostic observations only; pharmacologic intervention not indicated or initiated (e.g. dietary modification)<br>2: Symptomatic; oral agent indicated or initiated<br>3: Severe symptoms; insulin indicated or initiated<br>4: Life threatening consequences, urgent intervention indicated or initiated<br>5: Death                                                                                                                                                                                                                                                                                                                                                                                                                      |                                                                                              |
| <b>Overweight/Obesity</b>                                                 | Criteria per Centers for Disease Control and Prevention guidelines                                                                         | For age >= 20 years<br>1: Not applicable<br>2: BMI 25 - 29.9 kg/m2<br>3: BMI 30 - 39.9 kg/m2                                                                                                                                                                                                                                                                                                                                                                                                                                                                                                                                                                                                                                                                             | For age < 20 years<br>1: Not applicable<br>2: BMI >= 85th%ile <95th%ile<br>3: BMI > 95th%ile |

|                                                                                                                              |                                                                         |                                                                                                                                                                                                                                                                                                                                                                                                                                                                                            |                                                                                                                                            |
|------------------------------------------------------------------------------------------------------------------------------|-------------------------------------------------------------------------|--------------------------------------------------------------------------------------------------------------------------------------------------------------------------------------------------------------------------------------------------------------------------------------------------------------------------------------------------------------------------------------------------------------------------------------------------------------------------------------------|--------------------------------------------------------------------------------------------------------------------------------------------|
|                                                                                                                              |                                                                         | 4: BMI $\geq$ 40 kg/m <sup>2</sup><br>5: Not applicable                                                                                                                                                                                                                                                                                                                                                                                                                                    | 4: Not applicable<br>5: Not applicable                                                                                                     |
| <b>Underweight</b>                                                                                                           | Criteria per Centers for Disease Control and Prevention guidelines      | For age $\geq$ 20 years<br>1: Not applicable<br>2: BMI < 18.5 kg/m <sup>2</sup><br>3: Not applicable<br>4: Not applicable<br>5: Not applicable                                                                                                                                                                                                                                                                                                                                             | For age 2 -< 20 years<br>1: Not applicable<br>2: BMI < 5 <sup>th</sup> %ile<br>3: Not applicable<br>4: Not applicable<br>5: Not applicable |
| <b>Coronary artery disease</b><br>(Includes myocardial infarction)                                                           | <b>Modified</b> CTCAE v4.03<br>Cardiac Disorders: Myocardial infarction | 1: Asymptomatic; clinical or diagnostic observations only; intervention not indicated<br>2: Mild symptoms and cardiac enzymes minimally abnormal and no evidence of ischemic ECG changes<br>3: Severe symptoms; cardiac enzymes abnormal; hemodynamically stable; ECG changes consistent with infarction (Q waves)<br>4: Life-threatening consequences; hemodynamically unstable (CABG or angioplasty)<br>5: Death                                                                         |                                                                                                                                            |
| <b>Cerebrovascular accident</b><br>(Includes: lacunes, hemorrhagic stroke, Ischemic stroke)                                  | CTCAEv4.03<br>Nervous system disorders: Stroke                          | 1: Asymptomatic or mild neurologic deficit; radiographic findings only<br>2: Moderate neurologic deficit<br>3: Severe neurologic deficit<br>4: Life-threatening consequences; urgent intervention indicated<br>5: Death                                                                                                                                                                                                                                                                    |                                                                                                                                            |
| <b>Vascular disease</b><br>(Stenosis/occlusion of vessel other than coronary or cerebral vessels, e.g., carotid, subclavian) | CTCAE v4.03 Vascular Disorders<br>Other, specify                        | 1: Asymptomatic or mild symptoms; clinical or diagnostic observations only; intervention not indicated<br>2: Moderate; minimal, local or noninvasive intervention indicated; limiting age appropriate instrumental ADL<br>3: Severe or medically significant but not immediately life threatening; hospitalization or prolongation of existing hospitalization indicated; disabling; limiting self-care ADL<br>4: Life-threatening consequences; urgent intervention indicated<br>5: Death |                                                                                                                                            |

**Table S3.** Characteristics of survivors with diagnosed grade 3 or 4 cardiomyopathy prior to the study date by medical management status.

| Population                   | Current treatment<br>N=37 |      | No current treatment<br>N=12 |      |       |
|------------------------------|---------------------------|------|------------------------------|------|-------|
|                              | N                         | %    | N                            | %    | P     |
| <b>Cardiomyopathy Grade</b>  |                           |      |                              |      |       |
| Grade 3                      | 29                        | 78.4 | 11                           | 91.7 | 0.302 |
| Grade 4                      | 8                         | 21.6 | 1                            | 8.3  |       |
| <b>Treatment</b>             |                           |      |                              |      |       |
| Beta-blocker alone           | 7                         | 18.9 |                              |      |       |
| ACEi/ARB alone               | 3                         | 8.1  |                              |      |       |
| Loop diuretic alone          | 1                         | 2.7  |                              |      |       |
| ACEi + beta blocker          | 12                        | 32.4 |                              |      |       |
| ACEi + loop diuretic         | 2                         | 5.4  |                              |      |       |
| All three classes            | 12                        | 32.4 |                              |      |       |
| <b>Ejection Fraction, %*</b> |                           |      |                              |      |       |
| ≥53                          | 13                        | 40.6 | 5                            | 41.7 | 1.000 |
| 40 - <53                     | 16                        | 50.0 | 6                            | 50.0 |       |
| <40                          | 3                         | 9.4  | 1                            | 8.3  |       |
| <b>NT-proBNP</b>             |                           |      |                              |      |       |
| <b>Overall**</b>             |                           |      |                              |      |       |
| Normal                       | 12                        | 32.4 | 4                            | 33.3 | 1.000 |
| Abnormal                     | 25                        | 67.6 | 8                            | 66.7 |       |
| <b>Value, pg/ml</b>          |                           |      |                              |      |       |
| <50                          | 7                         | 18.9 | 1                            | 8.3  | 0.266 |
| 50-125                       | 6                         | 16.2 | 5                            | 41.7 |       |
| 126-450                      | 11                        | 29.7 | 4                            | 33.3 |       |
| >450                         | 13                        | 35.1 | 2                            | 16.7 |       |

ACEi: angiotensin converting enzyme inhibitor; ARB: angiotensin receptor blocker

\*Ejection Fraction at the time of the current visit (biomarker analysis).

\*\*NT-proBNP based on age- and sex- specific 97.5<sup>th</sup> quantile regression reference limits reported by Fradley et al. using the Framingham cohort.

**Table S4.** Characteristics of childhood cancer survivors exposed and not exposed to anthracycline chemotherapy and/or chest-directed radiotherapy

|                                                       | <b>All Survivors<br/>N=1213</b> | <b>Exposed<br/>Survivors<br/>N=786</b> | <b>Non-exposed<br/>Survivors<br/>N=427</b> |
|-------------------------------------------------------|---------------------------------|----------------------------------------|--------------------------------------------|
|                                                       | <b>N (%)</b>                    | <b>N (%)</b>                           | <b>N (%)</b>                               |
| <b>Age at diagnosis, years.<br/>(median – IQR)</b>    | 8.7 (3.7-14.3)                  | 10.0 (4.2-14.7)                        | 7.1 (3.1-12.9)                             |
| <b>Age at evaluation, years<br/>(median – IQR)</b>    | 35.5 (29.8-42.5)                | 35.9 (30.2-42.7)                       | 34.3 (28.3-42.3)                           |
| <b>Time since diagnosis, years<br/>(median – IQR)</b> | 26.4 (19.9-33.8)                | 26.3 (20.4-33.1)                       | 27.1 (18.7-35.1)                           |
| <b>Sex</b>                                            |                                 |                                        |                                            |
| Male                                                  | 623 (51.4)                      | 419 (53.3)                             | 204 (47.8)                                 |
| Female                                                | 590 (48.6)                      | 367 (46.7)                             | 223 (52.2)                                 |
| <b>Race/ethnicity</b>                                 |                                 |                                        |                                            |
| Non-Hispanic White                                    | 1016 (83.7)                     | 669 (85.2)                             | 347 (81.3)                                 |
| Non-Hispanic Black                                    | 168 (13.9)                      | 98 (12.5)                              | 70 (16.4)                                  |
| Hispanic                                              | 11 (0.9)                        | 8 (1.0)                                | 3 (0.7)                                    |
| Other                                                 | 18 (1.5)                        | 10 (1.3)                               | 7 (1.6)                                    |
| <b>Health habits (median - IQR)</b>                   |                                 |                                        |                                            |
| Smoking (pack years)                                  | 0.0 (0.0-1.8)                   | 0.0 (0.0-2.5)                          | 0.0 (0.0-0.7)                              |
| Weekly minutes of MVPA                                | 140.0 (0.0-420.6)               | 128.5 (0.0-427.2)                      | 153.4 (0.0-415.8)                          |
| Healthy Eating Index                                  | 58.4 (49.4-67.4)                | 58.2 (49.0-67.7)                       | 58.6 (50.9-66.5)                           |
| <b>Insurance status</b>                               |                                 |                                        |                                            |
| Yes                                                   | 973 (80.2)                      | 626 (79.6)                             | 347 (81.3)                                 |
| No                                                    | 240 (19.8)                      | 160 (20.4)                             | 80 (18.7)                                  |
| <b>Primary Cancer Diagnosis</b>                       |                                 |                                        |                                            |
| Acute lymphoblastic leukemia                          | 257 (21.2)                      | 151 (19.2)                             | 106 (24.8)                                 |
| Acute myeloid leukemia                                | 38 (3.1)                        | 37 (4.7)                               | 1 (0.2)                                    |
| Other leukemia                                        | 11 (0.9)                        | 1 (0.1)                                | 10 (2.3)                                   |
| Hodgkin lymphoma                                      | 238 (19.6)                      | 224 (28.5)                             | 14 (3.3)                                   |
| Non-Hodgkin lymphoma                                  | 58 (4.8)                        | 49 (6.2)                               | 9 (2.1)                                    |
| CNS tumor                                             | 177 (14.6)                      | 63 (8.0)                               | 114 (26.7)                                 |
| Wilms tumor                                           | 91 (7.5)                        | 68 (8.7)                               | 23 (5.4)                                   |
| Retinoblastoma                                        | 45 (3.7)                        | 4 (0.5)                                | 41 (9.6)                                   |
| Soft tissue sarcoma                                   | 64 (5.3)                        | 35 (4.5)                               | 29 (6.8)                                   |
| Neuroblastoma                                         | 59 (4.9)                        | 40 (5.1)                               | 19 (4.4)                                   |
| Osteosarcoma                                          | 60 (5.0)                        | 55 (7.0)                               | 5 (1.2)                                    |
| Ewing sarcoma                                         | 50 (4.1)                        | 49 (6.2)                               | 1 (0.2)                                    |
| Other                                                 | 65 (5.4)                        | 10 (1.3)                               | 55 (12.9)                                  |
| <b>Cardiotoxic Therapy Exposures</b>                  |                                 |                                        |                                            |
| Anthracycline Only                                    |                                 | 366 (46.6)                             |                                            |
| Chest RT Only                                         |                                 | 174 (22.1)                             |                                            |
| Chest RT + Anthracyclines                             |                                 | 246 (31.3)                             |                                            |
| <b>Anthracycline Exposure</b>                         |                                 |                                        |                                            |
| Dose (median - IQR), mg/m <sup>2</sup>                |                                 | 204 (152.1-341.6)                      |                                            |
| None                                                  | 601 (49.6)                      | 174 (22.1)                             | 427 (100.0)                                |
| 1-200 mg/m <sup>2</sup>                               | 272 (22.4)                      | 272 (34.6)                             |                                            |
| 201-350 mg/m <sup>2</sup>                             | 196 (16.2)                      | 196 (24.9)                             |                                            |
| >350 mg/m <sup>2</sup>                                | 144 (11.9)                      | 144 (18.3)                             |                                            |
| <b>Chest-directed RT maxTD (Gy)</b>                   |                                 |                                        |                                            |
| None                                                  | 793 (65.4)                      | 366 (46.6)                             | 427 (100.0)                                |
| 1-19.9                                                | 66 (5.4)                        | 66 (8.4)                               |                                            |

|                                                |                  |                  |                  |
|------------------------------------------------|------------------|------------------|------------------|
| 20-29.9                                        | 207 (17.1)       | 207 (26.3)       |                  |
| ≥30                                            | 147 (12.1)       | 147 (18.7)       |                  |
| <b>Cardiovascular Risk Factors**</b>           |                  |                  |                  |
| Diabetes Mellitus                              | 120 (9.9)        | 78 (9.9)         | 42 (9.8)         |
| Hypertension                                   | 346 (28.5)       | 218 (27.7)       | 128 (30.0)       |
| Dyslipidemia                                   | 179 (14.8)       | 115 (14.6)       | 64 (15.0)        |
| <b>BMI, kg/m<sup>2</sup> (median – IQR)***</b> | 27.1 (23.5-32.5) | 27.0 (23.3–32.2) | 27.4 (23.7–33.1) |
| <18.5                                          | 50 (4.1)         | 37 (4.7)         | 13 (3.0)         |
| 18.5-24.9                                      | 354 (29.2)       | 230 (29.3)       | 124 (29.0)       |
| 25-29.9                                        | 389 (32.1)       | 256 (32.6)       | 133 (31.2)       |
| ≥30                                            | 420 (34.6)       | 263 (33.5)       | 157 (36.8)       |
| <b>Coronary Artery Disease**,***</b>           |                  |                  |                  |
| No                                             | 1129 (93.1)      | 714 (90.8)       | 415 (97.2)       |
| Grade 2                                        | 2 (0.2)          | 2 (0.3)          | 0 (0.0)          |
| Grade 3                                        | 61 (5.0)         | 52 (6.6)         | 9 (2.1)          |
| Grade 4                                        | 18 (1.7)         | 18 (2.3)         | 3 (0.7)          |
| <b>Previous cardiomyopathy§</b>                |                  |                  |                  |
| No                                             | 1109 (91.4)      | 688 (87.5)       | 421 (98.6)       |
| Grade 2                                        | 55 (4.5)         | 52 (6.6)         | 3 (0.7)          |
| Grade 3                                        | 40 (3.3)         | 38 (4.8)         | 2 (0.5)          |
| Grade 4                                        | 9 (0.7)          | 8 (1.0)          | 1 (0.2)          |

MVPA: Moderate or vigorous physical activity; IQR: Interquartile range; RT: Radiation therapy; maxTD: maximum target dose

\*Percentages for individual characteristics calculated on total number of participants on whom information was available

\*\*CTCAE grade ≥2 at the time of the evaluation or previously diagnosed

\*\*\*See Table S2 for CTCAE grading

§ CTCAE grade ≥2 prior to the current evaluation

**Table S5.** Distribution of cardiac biomarkers among participants exposed and not exposed to cardiotoxic therapy

| Population                                             | N Overall | Cardiac Troponin-T | NT-proBNP      |                     |         |
|--------------------------------------------------------|-----------|--------------------|----------------|---------------------|---------|
|                                                        |           | N=1213             | N=1213         |                     |         |
|                                                        |           | N abnormal (%)     | N abnormal (%) | Median [IQR]        | P       |
| <b>Overall</b>                                         | 1213      | 5 (0.4)            | 273 (22.5)     | 41.0 [20.0, 84.0]   |         |
| <b>Gender</b>                                          |           |                    |                |                     |         |
| Female                                                 | 590       | 1 (0.2)            | 114 (19.3)     | 60.0 [30.0, 121.0]  | <0.0001 |
| Male                                                   | 623       | 4 (0.6)            | 159 (25.5)     | 29.0 [15.0, 62.0]   |         |
| <b>Exposure status</b>                                 |           |                    |                |                     |         |
| Unexposed Survivors                                    | 427       | 0 (0.0)            | 32 (7.5)       | 28.0 [14.0, 57.0]   | <0.0001 |
| Exposed Survivors                                      | 786       | 5 (0.6)            | 241 (30.7)     | 53.0 [26.0, 110.0]  |         |
| <b>Age at assessment in years</b>                      |           |                    |                |                     |         |
| 18-20                                                  | 34        | 0 (0.0)            | 3 (8.8)        | 30.0 [15.0, 42.0]   | <0.0001 |
| 21-30                                                  | 353       | 0 (0.0)            | 78 (22.1)      | 34.0 [16.0, 72.0]   |         |
| 31-40                                                  | 460       | 3 (0.7)            | 101 (22.0)     | 41.0 [21.0, 82.0]   |         |
| 41-50                                                  | 292       | 2 (0.7)            | 68 (23.3)      | 51.0 [24.0, 107.0]  |         |
| 51+                                                    | 74        | 0 (0.0)            | 23 (31.1)      | 64.0 [32.0, 186.0]  |         |
| <b>Survival time in years</b>                          |           |                    |                |                     |         |
| 10-15                                                  | 139       | 0 (0.0)            | 25 (18.0)      | 32.0 [17.0, 65.0]   | <0.0001 |
| 16-20                                                  | 231       | 1 (0.4)            | 44 (19.1)      | 33.0 [17.0, 74.0]   |         |
| 21-25                                                  | 220       | 0 (0.0)            | 48 (21.8)      | 42.0 [20.0, 78.5]   |         |
| 26-30                                                  | 206       | 1 (0.5)            | 56 (27.2)      | 39.5 [21.0, 86.0]   |         |
| 31+                                                    | 417       | 3 (0.7)            | 100 (24.0)     | 51.0 [23.0, 118.0]  |         |
| <b>Anthracycline cumulative dose, mg/m<sup>2</sup></b> |           |                    |                |                     |         |
| 1-200 mg/m <sup>2</sup>                                | 272       | 1 (0.4)            | 54 (19.9)      | 44.0 [22.0, 76.0]   | <0.0001 |
| 201-350 mg/m <sup>2</sup>                              | 196       | 1 (0.5)            | 65 (33.2)      | 63.0 [26.0, 122.0]  |         |
| >350 mg/m <sup>2</sup>                                 | 144       | 1 (0.7)            | 55 (38.2)      | 69.5 [31.0, 152.5]  |         |
| <b>Chest directed RT dose, Gy</b>                      |           |                    |                |                     |         |
| 1-19.9 Gy                                              | 66        | 0 (0.0)            | 20 (30.3)      | 41.0 [22.0, 81.0]   | 0.04    |
| 20-29.9 Gy                                             | 207       | 0 (0.0)            | 52 (25.1)      | 53.0 [27.0, 94.0]   |         |
| ≥30 Gy                                                 | 147       | 2 (1.4)            | 72 (49.0)      | 78.0 [32.0, 212.0]  |         |
| <b>Male</b>                                            |           |                    |                |                     |         |
| Unexposed survivors                                    | 204       | 0 (0.0)            | 17 (8.3)       | 17.0 [9.0, 33.0]    | <0.0001 |
| Exposed survivors                                      | 419       | 4 (1.0)            | 142 (33.9)     | 36.0 [19.0, 76.0]   |         |
| <b>Female</b>                                          |           |                    |                |                     |         |
| Unexposed survivors                                    | 223       | 0 (0.0)            | 15 (6.7)       | 39.0 [23.0, 78.0]   | <0.0001 |
| Exposed survivors                                      | 367       | 1 (0.3)            | 99 (27.0)      | 74.0 [39.0, 155.0]  |         |
| <b>Male - exposed</b>                                  |           |                    |                |                     |         |
| Anthracycline only                                     | 190       | 2 (1.1)            | 56 (29.5)      | 32.0 [18.0, 68.0]   | 0.09    |
| Chest RT Only                                          | 110       | 2 (1.8)            | 41 (37.3)      | 42.0 [19.0, 82.0]   |         |
| Anthracycline + chest RT                               | 119       | 0 (0.0)            | 45 (37.8)      | 42.0 [24.0, 84.0]   |         |
| <b>Female - exposed</b>                                |           |                    |                |                     |         |
| Anthracycline only                                     | 176       | 1 (0.6)            | 41 (23.3)      | 68.0 [38.5, 131.0]  | 0.02    |
| Chest RT only                                          | 64        | 0 (0.0)            | 26 (40.6)      | 75.0 [37.0, 149.0]  |         |
| Anthracycline + chest RT                               | 127       | 0 (0.0)            | 32 (25.2)      | 122.0 [48.0, 209.0] |         |
| <b>Cardiac event<sup>‡</sup></b>                       |           |                    |                |                     |         |
| <b>Cardiomyopathy</b>                                  |           |                    |                |                     |         |
| None                                                   | 1064      | 3 (0.3)            | 200 (18.8)     | 38.0 [19.0, 77.0]   | <0.0001 |



|                                |      |         |            |                      |         |
|--------------------------------|------|---------|------------|----------------------|---------|
| Grade 2                        | 89   | 0 (0.0) | 32 (36.0)  | 58.0 [30.0, 150.0]   |         |
| Grade 3                        | 51   | 1 (0.1) | 34 (66.7)  | 163.0 [62.0, 508.0]  |         |
| Grade 4                        | 9    | 1 (0.1) | 7 (77.8)   | 250.0 [151.0, 664.0] |         |
| <b>Coronary artery disease</b> |      |         |            |                      |         |
| None                           | 1129 | 4 (0.3) | 229 (20.3) | 40.0 [20.0, 80.0]    | <0.0001 |
| Grade 2                        | 2    | 0 (0.0) | 2 (100.0)  | 196.0 [186.0, 206.0] |         |
| Grade 3                        | 61   | 0 (0.0) | 30 (49.2)  | 74.0 [35.0, 190.0]   |         |
| Grade 4                        | 21   | 1 (0.1) | 12 (57.1)  | 88.0 [61.0, 398.0]   |         |

RT: radiation therapy.

\*Percentages for abnormal are calculated on total number of participants within each group on whom information was available and abnormal values were defined as troponin-T >0.01 ng/mL and NT-proBNP based on age- and sex- specific 97.5<sup>th</sup> quantile regression reference limits reported by Fradley et al. using the Framingham Heart Study cohort.

\*\* The percentage in N (% abnormal) is the percent of abnormality in each stratum (row).

\*\*\* P values are for comparisons of value distribution using Wilcox test.

¥CTCAE grade at the time of the evaluation or previously diagnosed.

**Table S6.** Multivariable associations between treatment exposures, traditional cardiovascular risk factors and abnormal NT-proBNP in adult survivors of childhood cancer

|                                              | N    | Abnormal NT-proBNP, N (%) | Treatment Exposures Model |             | Cardiovascular Risk Factor Model |
|----------------------------------------------|------|---------------------------|---------------------------|-------------|----------------------------------|
|                                              |      |                           | RR (95% CI)               | P for trend | RR (95% CI)                      |
| <b>Sex</b>                                   |      |                           |                           |             |                                  |
| Male                                         | 623  | 159 (25.5)                | <b>1.28 (1.05-1.57)</b>   |             | <b>1.29 (1.05-1.59)</b>          |
| Female                                       | 590  | 114 (19.3)                | 1.0                       |             | 1.0                              |
| <b>Race/Ethnicity</b>                        |      |                           |                           |             |                                  |
| Non-Hispanic White                           | 1016 | 237 (23.3)                | 1.18 (0.88-1.58)          |             | <b>1.41 (1.05-1.90)</b>          |
| Other                                        | 197  | 36 (18.3)                 | 1.0                       |             | 1.0                              |
| <b>Age at diagnosis, years</b>               |      |                           |                           |             |                                  |
| <5                                           | 392  | 87 (22.2)                 | <b>1.56 (1.14-2.14)</b>   |             | <b>1.46 (1.07-2.00)</b>          |
| 5-9.9                                        | 269  | 62 (23.1)                 | 1.26 (0.92-1.73)          |             | 1.26 (0.92-1.71)                 |
| 10-14.9                                      | 293  | 73 (24.9)                 | 1.21 (0.89-1.65)          |             | 1.26 (0.93-1.70)                 |
| 15-20.9                                      | 259  | 51 (19.7)                 | 1.0                       |             | 1.0                              |
| <b>Current age, years</b>                    |      |                           |                           |             |                                  |
| 18-30                                        | 387  | 81 (20.9)                 | 1.0                       |             | 1.0                              |
| 31-40                                        | 460  | 101 (22.0)                | 0.98 (0.76-1.27)          |             | 1.05 (0.82-1.36)                 |
| >40                                          | 366  | 91 (24.9)                 | 1.10 (0.84-1.42)          |             | 1.04 (0.78-1.38)                 |
| <b>Anthracycline dose (mg/m<sup>2</sup>)</b> |      |                           |                           |             |                                  |
| 0                                            | 601  | 99 (16.5)                 | 1.0                       | <0.0001     | --                               |
| 1-200                                        | 272  | 54 (19.9)                 | <b>1.39 (1.01-1.91)</b>   |             | --                               |
| 201-350                                      | 196  | 65 (33.2)                 | <b>2.28 (1.74-2.99)</b>   |             | --                               |
| >350                                         | 144  | 55 (38.2)                 | <b>2.99 (2.27-3.95)</b>   |             | --                               |
| <b>Chest-directed RT maxTD dose (Gy)</b>     |      |                           |                           |             | --                               |
| 0                                            | 793  | 129 (16.3)                | 1.0                       | <0.0001     | --                               |
| 1-19.9                                       | 66   | 20 (30.3)                 | <b>1.62 (1.07-2.46)</b>   |             | --                               |
| 20-29.9                                      | 207  | 52 (25.1)                 | <b>1.68 (1.23-2.30)</b>   |             | --                               |
| ≥30                                          | 147  | 72 (49.0)                 | <b>3.66 (2.89-4.64)</b>   |             | --                               |
| <b>Cardiovascular Risk Factors*</b>          |      |                           |                           |             |                                  |
| <b>Diabetes mellitus*</b>                    |      |                           |                           |             |                                  |
| No                                           | 1093 | 247 (22.6)                | --                        |             | 1.0                              |
| Yes                                          | 120  | 26 (21.7)                 | --                        |             | 1.04 (0.73-1.41)                 |
| <b>Hypertension*</b>                         |      |                           |                           |             |                                  |
| No                                           | 867  | 188 (21.7)                | --                        |             | 1.0                              |
| Yes                                          | 346  | 85 (24.6)                 | --                        |             | 1.06 (0.82-1.36)                 |
| <b>Dyslipidemia*</b>                         |      |                           |                           |             |                                  |
| No                                           | 1034 | 229 (22.5)                | --                        |             | 1.0                              |
| Yes                                          | 179  | 44 (24.6)                 | --                        |             | 1.02 (0.76-1.36)                 |
| <b>BMI (kg/m<sup>2</sup>)</b>                |      |                           |                           |             |                                  |
| <18.5                                        | 50   | 25 (50.0)                 | --                        |             | <b>1.43 (1.02-2.00)</b>          |

|                                  |      |            |    |  |                         |
|----------------------------------|------|------------|----|--|-------------------------|
| 18.5-24.9                        | 354  | 103 (29.1) | -- |  | 1.0                     |
| 25-29.9                          | 389  | 76 (19.5)  | -- |  | <b>0.61 (0.48-0.78)</b> |
| ≥30                              | 420  | 69 (16.4)  | -- |  | <b>0.57 (0.44-0.75)</b> |
| <b>Cardiomyopathy *</b>          |      |            |    |  |                         |
| No                               | 1064 | 200 (18.8) | -- |  | 1.0                     |
| Grade 2                          | 89   | 32 (36.0)  | -- |  | <b>1.41 (1.02-1.94)</b> |
| Grade 3                          | 51   | 34 (66.7)  | -- |  | <b>2.59 (1.93-3.47)</b> |
| Grade 4                          | 9    | 7 (77.8)   | -- |  | <b>3.05 (1.94-4.80)</b> |
| <b>Coronary Artery Disease *</b> |      |            |    |  |                         |
| No                               | 1129 | 229 (20.3) |    |  | <b>1.0</b>              |
| Grade 2 or 3                     | 63   | 32 (50.8)  | -- |  | <b>1.54 (1.13-2.09)</b> |
| Grade 4                          | 21   | 12 (57.1)  | -- |  | 1.03 (0.71-1.48)        |

RR: Relative Risk; CI: Confidence interval; RT: radiation therapy; maxTD: maximum target dose

Analyses modeled the RR of abnormal NT-proBNP adjusting for age at diagnosis, attained age, race, sex and all other covariates in the column.

P-value for trend with increasing dose of cardiotoxic therapy (anthracycline/Chest RT)

\*CTCAE grade ≥2 at the time of the evaluation or previously diagnosed.

**Table S7.** Alternative multivariable associations between treatment exposures and abnormal NT-proBNP in adult survivors of childhood cancer by a combination of dose and cardiotoxic agent exposure

| <b>Characteristic</b>          |      |                           | <b>Treatment Exposures Model</b> |
|--------------------------------|------|---------------------------|----------------------------------|
|                                | N    | Abnormal NT-proBNP, N (%) | RR (95% CI)                      |
| <b>Sex</b>                     |      |                           |                                  |
| Male                           | 623  | 159 (25.5)                | <b>1.28 (1.05-1.57)</b>          |
| Female                         | 590  | 114 (19.3)                | 1.0                              |
| <b>Race/Ethnicity</b>          |      |                           |                                  |
| Non-Hispanic White             | 1016 | 237 (23.3)                | 1.22 (0.90-1.64)                 |
| Other                          | 197  | 36 (18.3)                 | 1.0                              |
| <b>Age at diagnosis, years</b> |      |                           |                                  |
| <5                             | 392  | 87 (22.2)                 | <b>1.63 (1.19-2.22)</b>          |
| 5-9.9                          | 269  | 62 (23.1)                 | 1.36 (0.99-1.86)                 |
| 10-14.9                        | 293  | 73 (24.9)                 | 1.23 (0.90-1.67)                 |
| 15-20.9                        | 259  | 51 (19.7)                 | 1.0                              |
| <b>Current age, years</b>      |      |                           |                                  |
| 18-30                          | 387  | 81 (20.9)                 | 1.0                              |
| 31-40                          | 460  | 101 (22.0)                | 0.92 (0.71-1.19)                 |
| >40                            | 366  | 91 (24.9)                 | 1.09 (0.84-1.41)                 |
| <b>Exposure Risk</b>           |      |                           |                                  |
| None                           | 427  | 32 (7.5)                  | 1.0                              |
| Single agent low-dose          | 151  | 26 (17.2)                 | 0.47 (0.29-0.76)                 |
| Both agents low-dose           | 22   | 7 (31.8)                  | <b>2.06 (1.02-4.17)</b>          |
| Single agent high-dose         | 532  | 172 (32.3)                | <b>2.09 (1.42-3.06)</b>          |
| Both agents high-dose          | 81   | 36 (44.4)                 | <b>3.18 (2.04-4.94)</b>          |

RR: Relative Risk; CI: Confidence interval; RT: radiation therapy; maxTD: maximum target dose  
 Exposure risk was categorized as none (no exposure to either anthracycline chemotherapy or chest RT), single agent low-dose (exposure to either 1-200 mg/m<sup>2</sup> anthracycline OR 1-19.9 Gy chest RT), both agents low-dose (exposure to both 1-200 mg/m<sup>2</sup> anthracycline AND 1-19.9 Gy chest RT), single agent high-dose (exposure to either ≥200 mg/m<sup>2</sup> anthracycline OR ≥20 Gy chest RT, could have received low dose or no exposure to other agent) and both agents high-dose (exposure to both ≥200 mg/m<sup>2</sup> anthracycline AND ≥20 Gy chest RT).

**Table S8.** Sensitivity, specificity and predictive values of abnormal NT-proBNP to identify new reduced LVEF (<53%), abnormal GLS or diastolic dysfunction among survivors previously undiagnosed with cardiomyopathy

|                                                 | <b>N*<br/>(%)</b> | <b>Sensitivity<br/>(95% CI)</b> | <b>Specificity<br/>(95% CI)</b> | <b>PPV<br/>(95% CI)</b> | <b>NPV<br/>(95% CI)</b> |
|-------------------------------------------------|-------------------|---------------------------------|---------------------------------|-------------------------|-------------------------|
| <b>All Survivors</b>                            |                   |                                 |                                 |                         |                         |
| LVEF < 53%                                      | 171 (16.4)        | 0.23 (0.17-0.29)                | 0.82 (0.80-0.85)                | 0.20 (0.15-0.26)        | 0.85 (0.82-0.87)        |
| Abnormal GLS                                    | 425 (39.8)        | 0.22 (0.18-0.26)                | 0.83 (0.80-0.86)                | 0.47 (0.40-0.54)        | 0.62 (0.59-0.65)        |
| Diastolic dysfunction                           | 222 (22.1)        | 0.26 (0.20-0.32)                | 0.84 (0.81-0.86)                | 0.31 (0.24-0.38)        | 0.80 (0.77-0.83)        |
| <b>Survivors exposed to cardiotoxic therapy</b> |                   |                                 |                                 |                         |                         |
| LVEF < 53%                                      | 120 (18.3)        | 0.29 (0.21-0.37)                | 0.75 (0.72-0.79)                | 0.21 (0.15-0.27)        | 0.83 (0.79-0.86)        |
| Abnormal GLS                                    | 290 (43.3)        | 0.30 (0.25-0.35)                | 0.77 (0.73-0.81)                | 0.50 (0.43-0.57)        | 0.59 (0.55-0.63)        |
| Diastolic dysfunction                           | 160 (25.4)        | 0.31 (0.24-0.39)                | 0.76 (0.72-0.80)                | 0.31 (0.24-0.39)        | 0.76 (0.72-0.80)        |

This analysis excludes those survivors diagnosed with grade 3 or 4 cardiomyopathy prior to this study.

\*N indicates the number of individuals with the outcome of interest (LVEF <53%, abnormal GLS, Diastolic dysfunction).

Note: A 95% CI including 0.5 indicates no significant difference from chance.

LVEF: left ventricular ejection fraction; GLS: global longitudinal strain; PPV: positive predictive value;

NPV: negative predictive value

**Table S9.** CTCAE grade of major cardiac events among exposed survivors with normal LVEF ( $\geq$ 53%) at baseline

| <b>Outcome</b>               | <b>Grade 2-4 Events<br/>N = 74</b> | <b>Grade 2 Events<br/>N=53</b> | <b>Grade 3 Events,<br/>N=12</b> | <b>Grade 4 Events,<br/>N=9</b> |
|------------------------------|------------------------------------|--------------------------------|---------------------------------|--------------------------------|
| <b>Myocardial Infarction</b> | 11                                 | 3                              | 2                               | 6                              |
| <b>Cardiomyopathy</b>        | 52                                 | 44                             | 8                               | 0                              |
| <b>Vascular Disease</b>      | 8                                  | 6                              | 0                               | 2                              |
| <b>Stroke</b>                | 3                                  | 0                              | 2                               | 1                              |

Of note, three survivors experienced multiple events during follow-up: one with cardiomyopathy and vascular disease, one with myocardial infarction and cardiomyopathy, one with cardiomyopathy, myocardial infarction and vascular disease.

**Figure S1.** FLOW diagram of study population

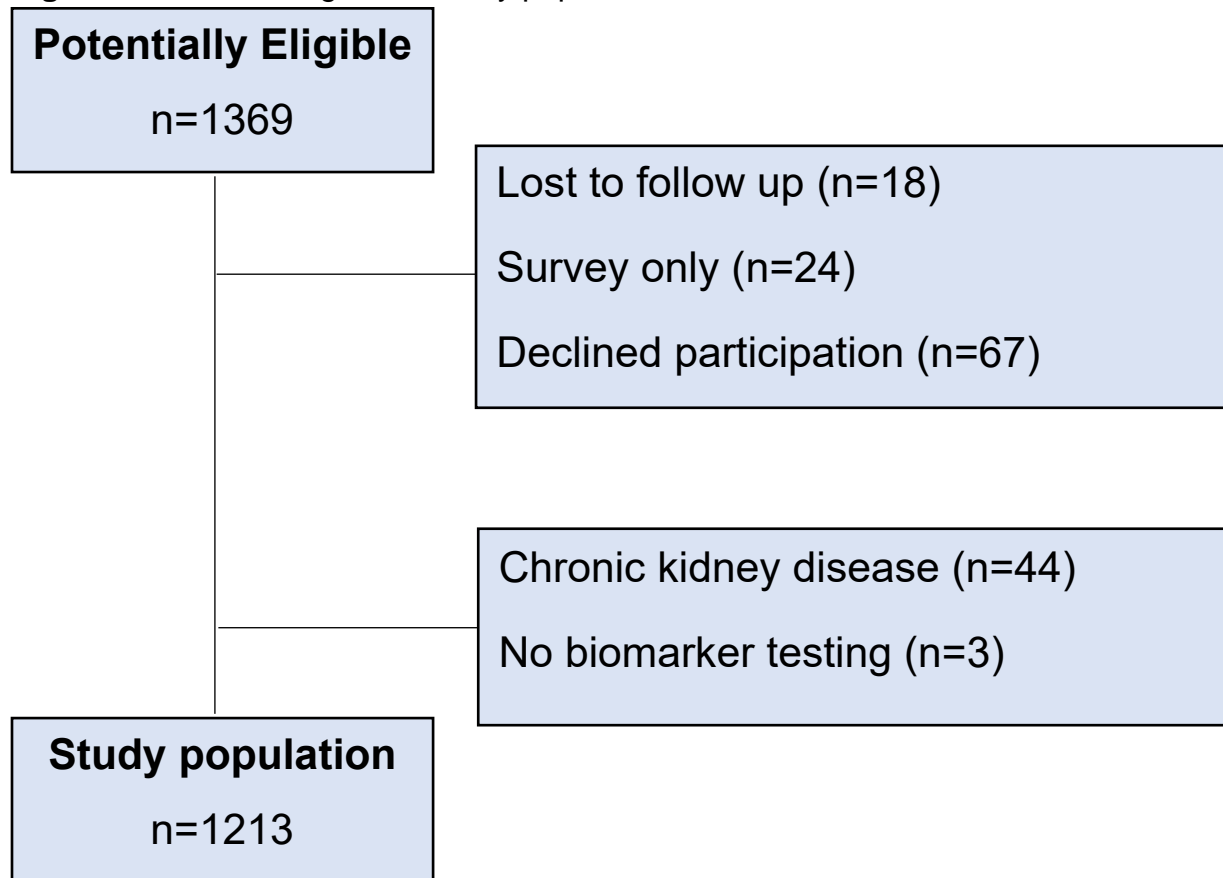

**Figure S2.** Scatterplots demonstrating the association between NT-proBNP values and a) age, d) ejection fraction (%), g) global longitudinal strain (GLS) z-score, and j) E/e' ratio for diastolic function among b) e) h) k) unexposed and c) f) i) l) exposed. Exposed and unexposed plots include regression lines. Three survivors with NT-proBNP >2000 pg/mL were excluded, all among exposed with EF <50%.

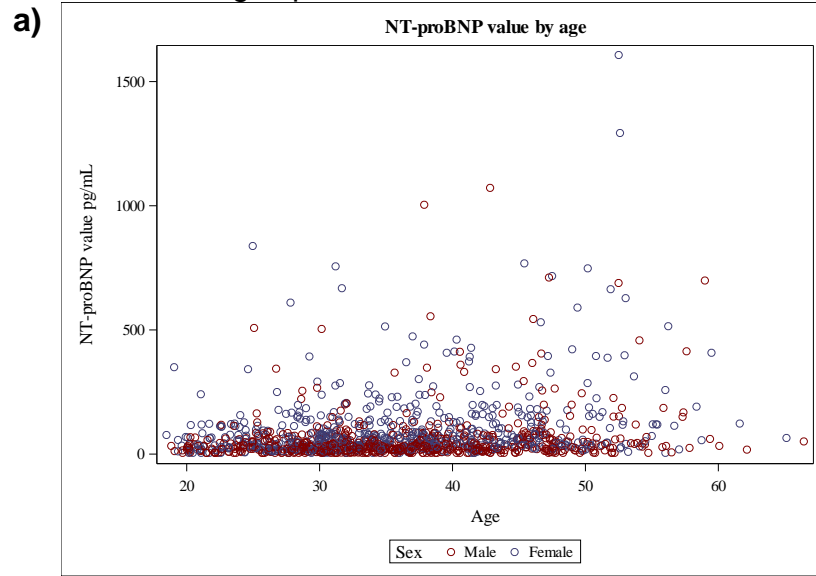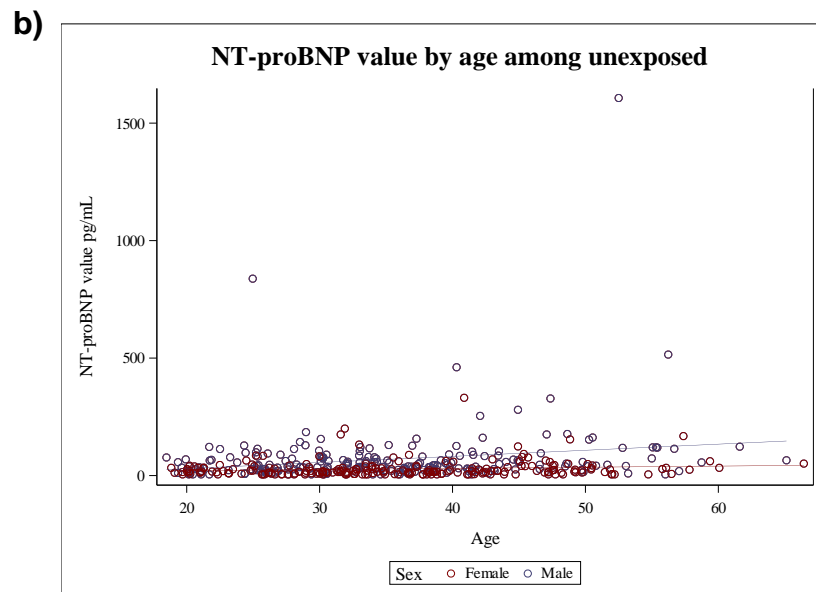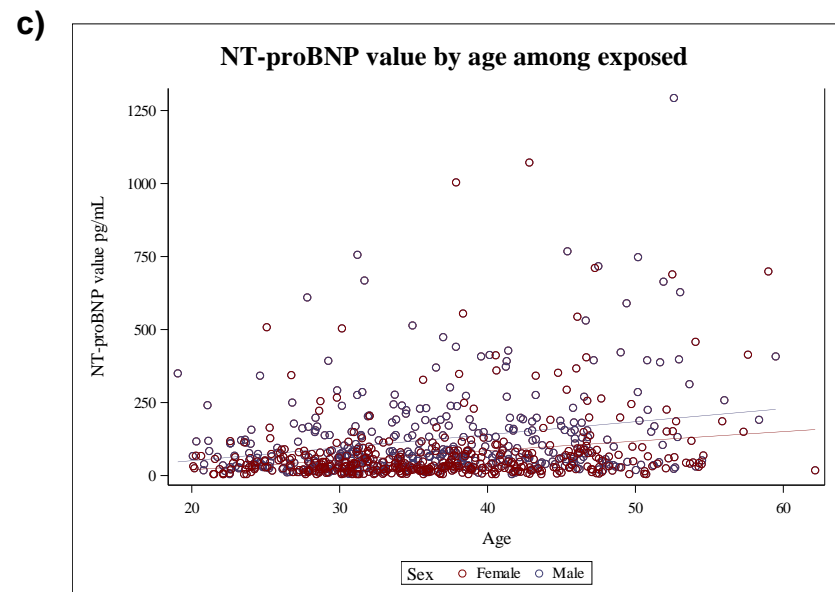

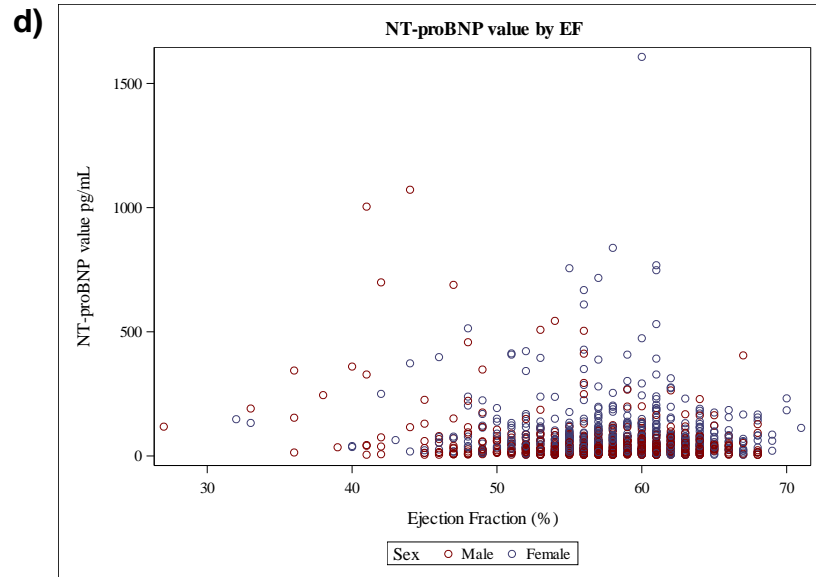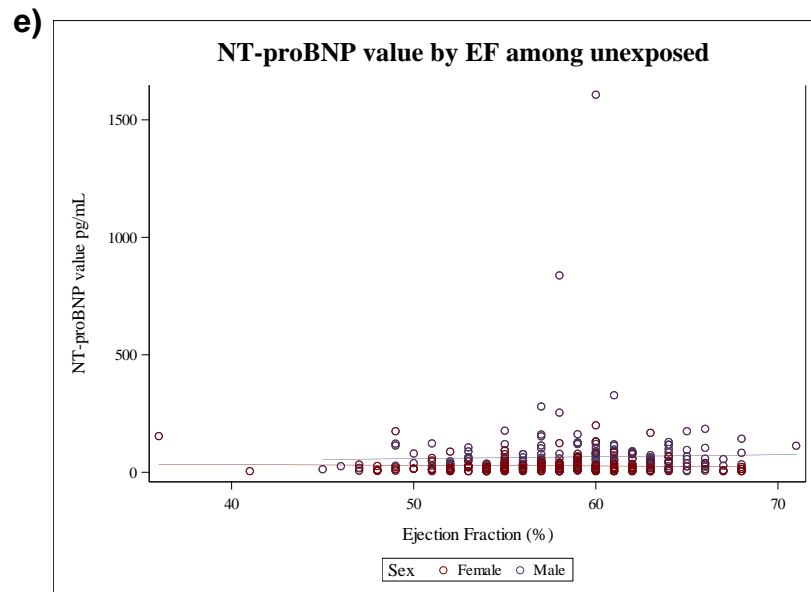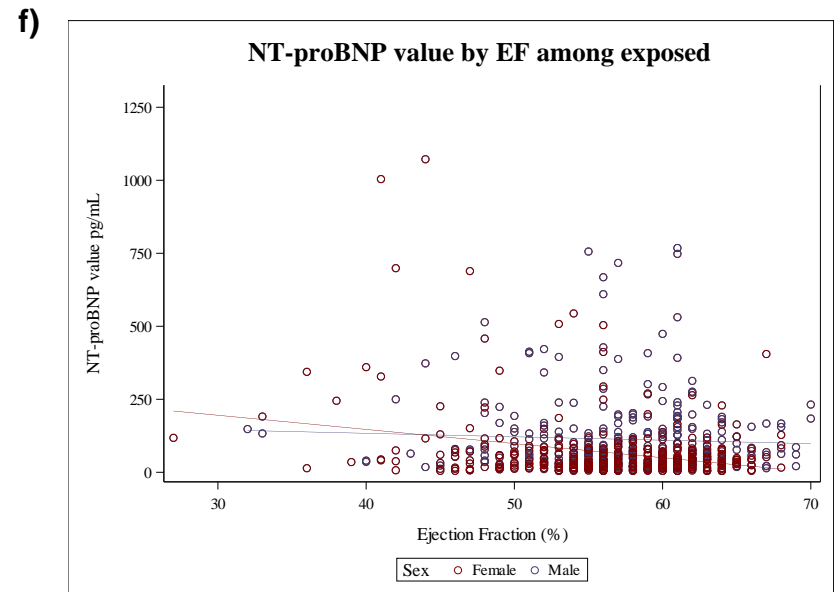



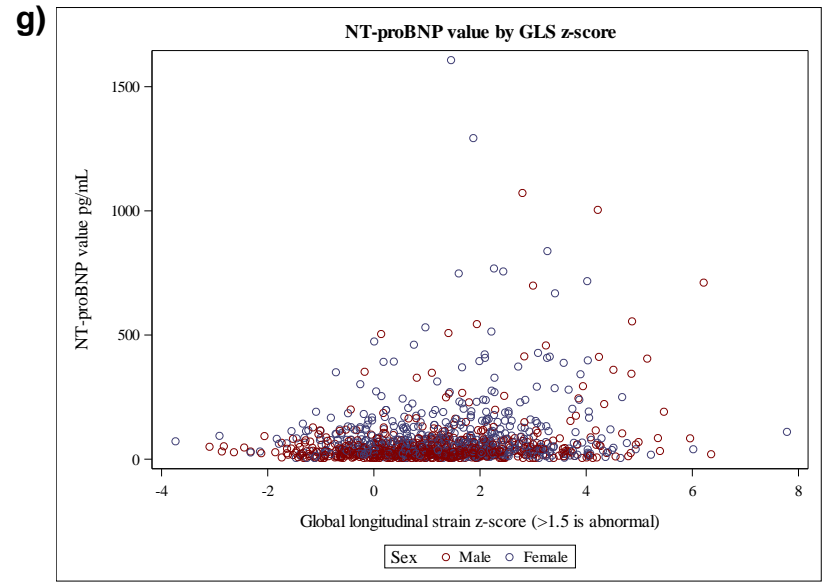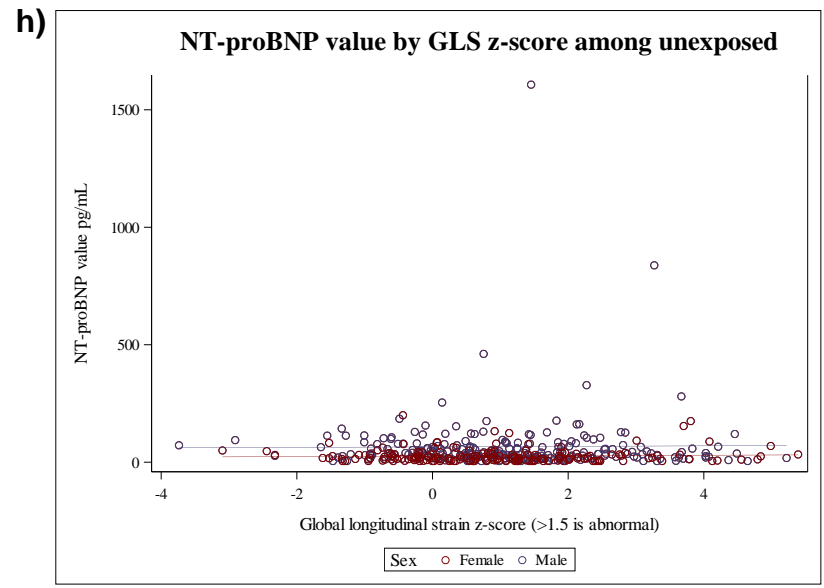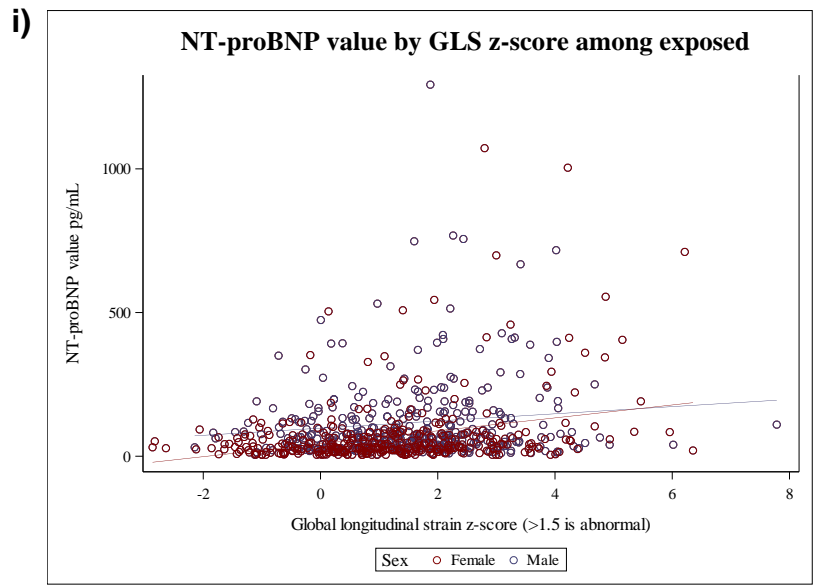

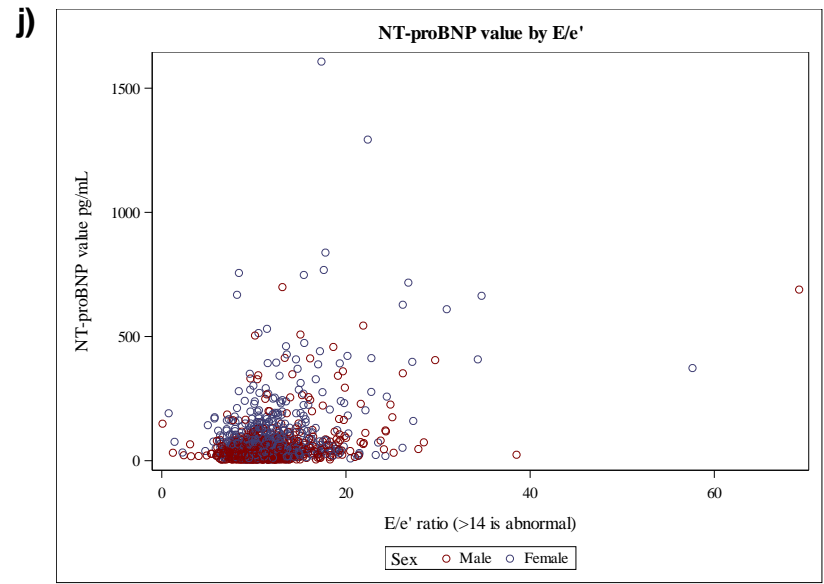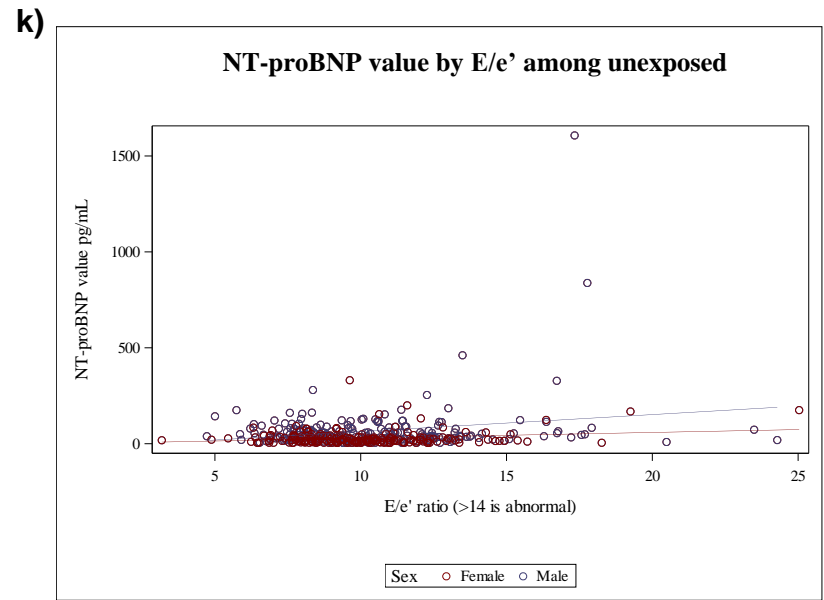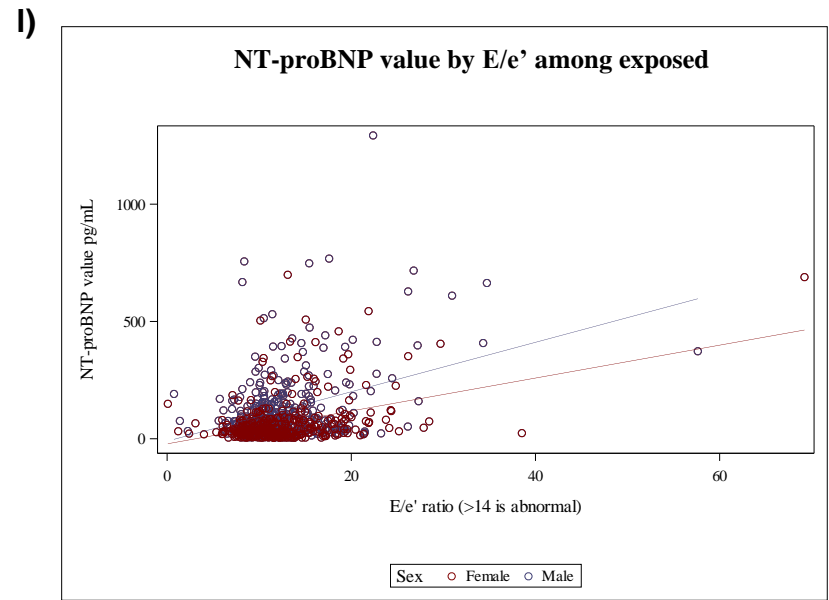

## References

1. US Department of Health and Human Services: National Health and Nutrition Examination Survey. 2007-2008 Data Documentation, Codebook, and Frequencies. Physical Activity (PAQ\_E). 2009. [https://wwwn.cdc.gov/Nchs/Nhanes/2007-2008/PAQ\\_E.htm#Component\\_Description](https://wwwn.cdc.gov/Nchs/Nhanes/2007-2008/PAQ_E.htm#Component_Description).
2. Dietary Guidelines for Americans 2015-2020. 8th ed. <http://health.gov/dietaryguidelines/2015/guidelines/>.
3. Krebs-Smith SM, Pannucci TE, Subar AF, et al. Update of the Healthy Eating Index: HEI-2015. *J Acad Nutr Diet*. 2018;118(9):1591-1602.
4. Brubaker PH, Kitzman DW. Chronotropic incompetence: causes, consequences, and management. *Circulation*. 2011;123(9):1010-1020.
5. Schultz MG, La Gerche A, Sharman JE. Blood Pressure Response to Exercise and Cardiovascular Disease. *Curr Hypertens Rep*. 2017;19(11):89.
6. Khan MN, Pothier CE, Lauer MS. Chronotropic incompetence as a predictor of death among patients with normal electrograms taking beta blockers (metoprolol or atenolol). *Am J Cardiol*. 2005;96(9):1328-1333.
7. Miller MR, Hankinson J, Brusasco V, et al. Standardisation of spirometry. *Eur Respir J*. 2005;26(2):319-338.
8. Feiring DC, Ellenbecker TS, Derscheid GL. Test-retest reliability of the biodex isokinetic dynamometer. *J Orthop Sports Phys Ther*. 1990;11(7):298-300.
9. Ness KK, Plana JC, Joshi VM, et al. Exercise intolerance, mortality, and organ system impairment in adult survivors of childhood cancer. *J Clin Oncol*. 2020;38(1):29-42.
10. Wampler M, Miaskowski C, Byl N, Rugo H, KS T. The modified total neuropathy score: A clinically feasible and valid measure of taxane-induced peripheral neuropathy in women with breast cancer. *J Support Oncol*. 2006;4:W9-W16.
